# Supplementary material for: Preparation and characterization of a ciprofloxacin-loaded nanoparticles incorporated polymeric film dressing
Source: Royal Society of Chemistry journal article supplement (doi:10.1039/d4ra02951h), 2024-01-01
Supplement: d4ra02951h1.pdf [file d4ra02951h1.pdf]

*Supplementary Information*

**Preparation and Characterization of Ciprofloxacin-loaded  
Nanoparticles Incorporated Polymeric Films Dressing**

Omar A. Alsaidan <sup>a</sup>, Naveed Ahmad <sup>\*a</sup>, Hasan Ejaz <sup>b</sup>, Muhammad Ajaz Hussain <sup>c</sup>, Ameeduzzafar  
Zafar <sup>a</sup>, and Hassan H. Alhassan <sup>b</sup>

<sup>a</sup> Department of Pharmaceutics, College of Pharmacy, Jouf University, Sakaka 72388, Aljouf,  
Saudi Arabia

<sup>b</sup> Department of Clinical Laboratory Sciences, College of Applied Medical Sciences, Jouf  
University, Sakaka 72388, Saudi Arabia.

<sup>c</sup> Centre for Organic Chemistry, School of Chemistry, University of the Punjab, Lahore 54590,  
Pakistan.

\* Correspondence: [nakahmad@ju.edu.sa](mailto:nakahmad@ju.edu.sa) (N.A.)

**Table S1:** Optimization of the AX-PC Films Formulations/Composition

| <b>Formulation Code</b> | <b>AX:PC*</b> | <b>GL (% v/v)</b> | <b>CP (% v/v)</b> | <b>Peelable</b> | <b>Foldable</b> | <b>Transparency</b> |
|-------------------------|---------------|-------------------|-------------------|-----------------|-----------------|---------------------|
| AXPC01                  | 1:1           | 1                 | -                 | ✘               | ✘               | ✓                   |
| AXPC1**                 | 1:1           | 2                 | -                 | ✓               | ✓               | ✓                   |
| AXPC2                   | 2:1           | 2                 | -                 | ✓               | ✘               | ✓                   |
| AXPC3                   | 1:2           | 2                 | -                 | ✓               | ✘               | ✓                   |
| AXPC-CP1**              | 1:1           | 2                 | 0.05              | ✓               | ✓               | ✓                   |
| AXPC-CP2                | 2:1           | 2                 | 0.05              | ✓               | ✘               | ✓                   |
| AXPC-CP3                | 1:2           | 2                 | 0.05              | ✓               | ✘               | ✓                   |

\* Ratios of mixing 4% (w/v) AX and 4% (w/v) PC dispersions

\*\* Films compositions selected for incorporation of blank and CP-loaded NPs.

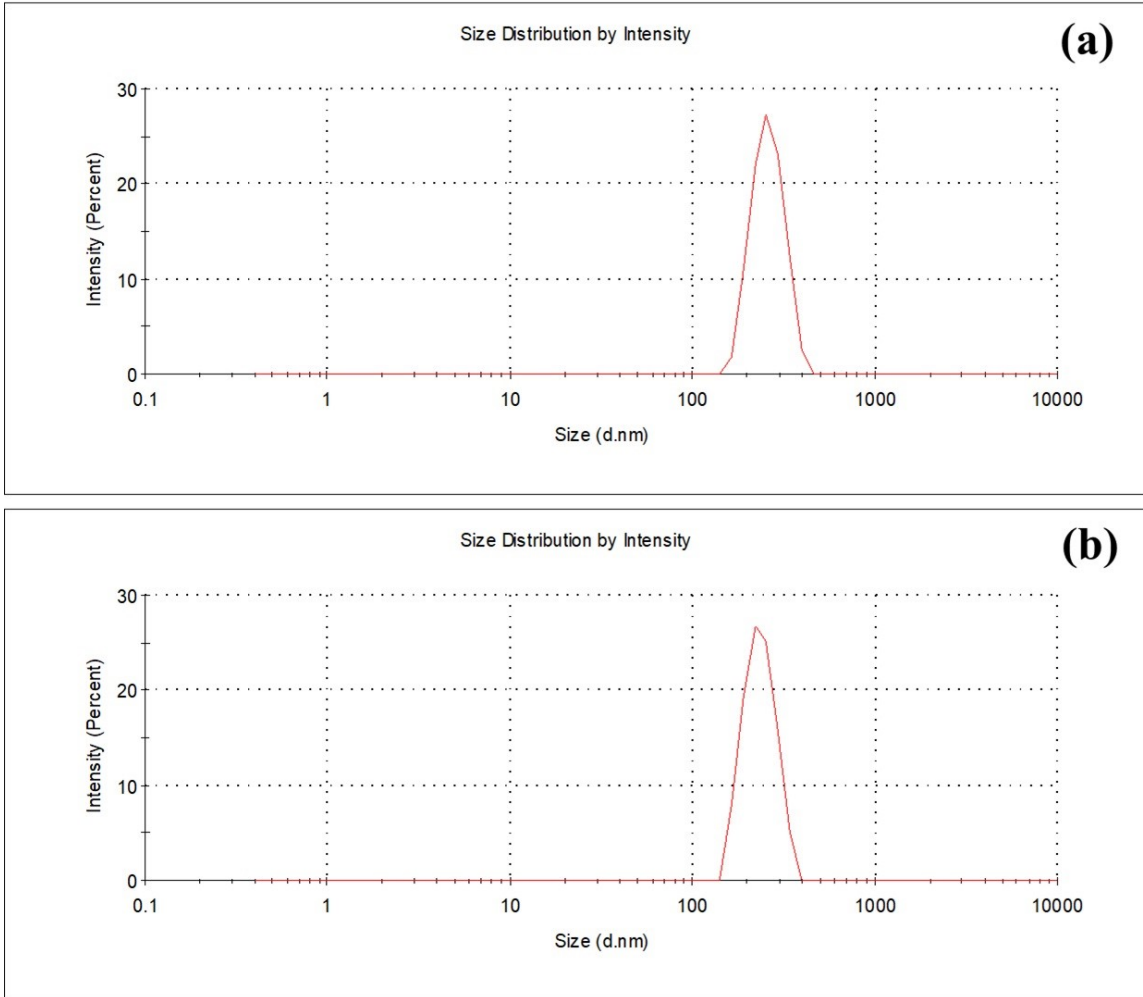

**Figure S1.** Particle size of blank (a) and CP-loaded (b) SA-CS NPs

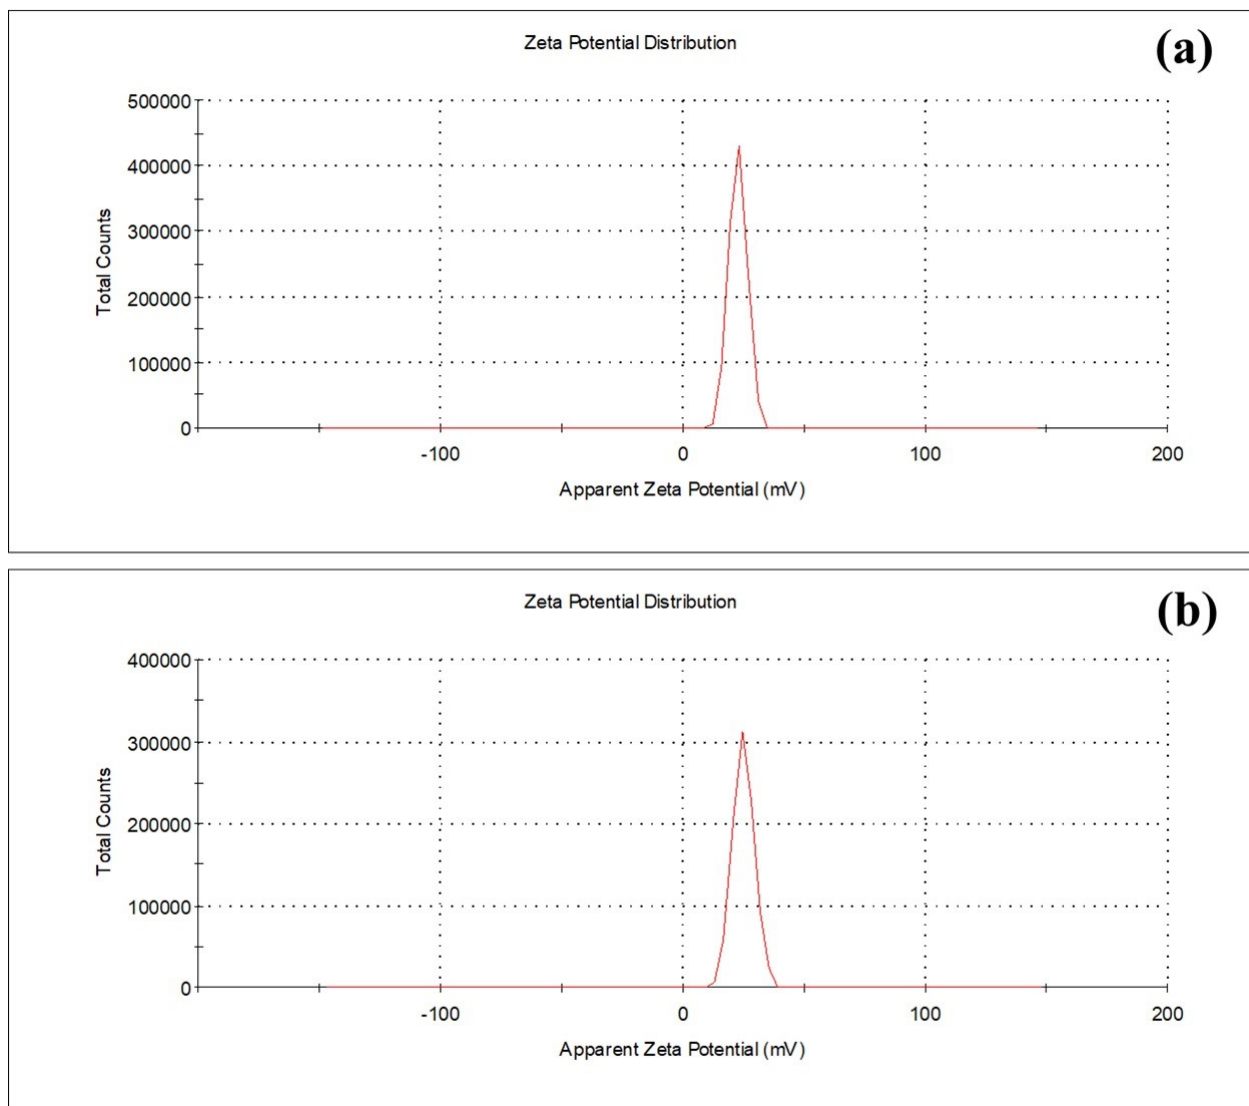

**Figure S2.** Zeta potential of blank (a) and CP-loaded (b) SA-CS NPs

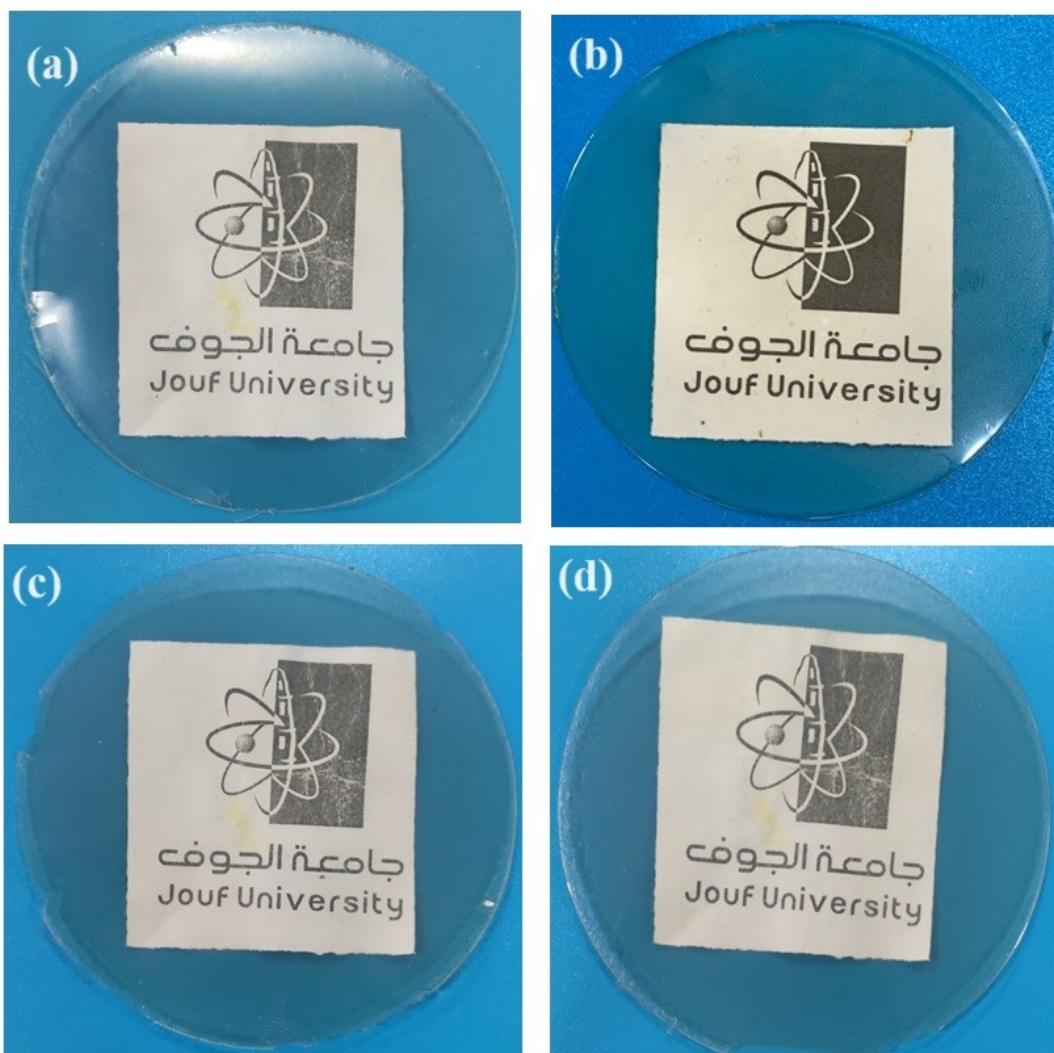

**Figure S3:** Optical images of the AX-PC films, BF (a), CF (b), NF (c), and NCF (d).

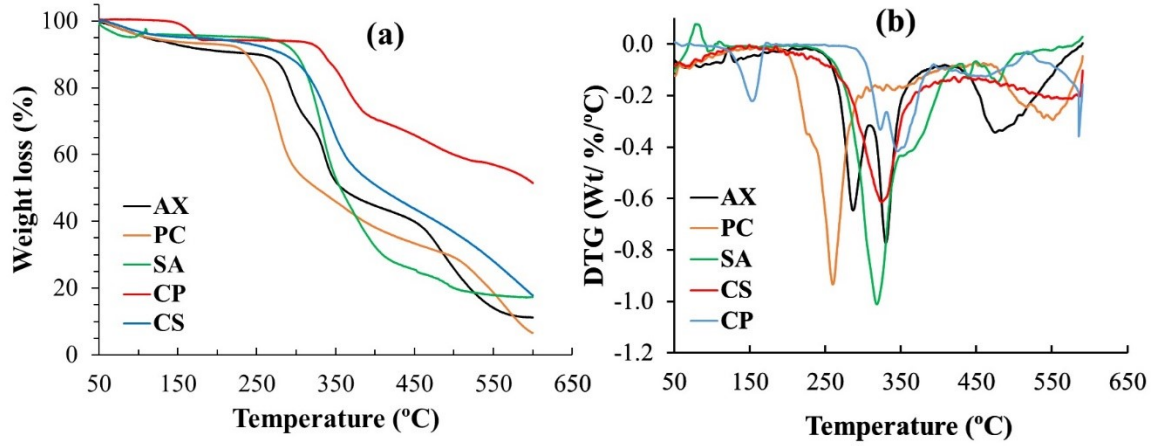

**Figure S4:** TGA (a) and DTG (b) curves of AX, PC, SA, CS, and CP

**Table S2:** Release kinetics of CP from CF and NCF (AX-PC) polymeric films

| Model | Zero-order |        | First order |             | Higuchi |        | Korsmeyer-Peppas |        |        |
|-------|------------|--------|-------------|-------------|---------|--------|------------------|--------|--------|
|       | $R^2$      | $K_0$  | $R^2$       | $K_1$       | $R^2$   | $K_H$  | $R^2$            | $K_K$  | $n$    |
| CF    | 0.8791     | 2.8962 | 0.6568      | -<br>0.0396 | 0.7013  | 12.54  | 0.9896           | 1.6417 | 0.4603 |
| NCF   | 0.4827     | 1.5597 | 0.9762      | -<br>0.0353 | 0.9519  | 14.596 | 0.9884           | 1.3898 | 0.4524 |
